# Supplementary material for: Polyiminofluorene with conjugated benzimidazolylpyridine substituent groups: optical properties, ionochromism and coordinative self-assembly into electrochromic films
Source: Royal Society of Chemistry journal article supplement (doi:10.1039/c4ra03969f), 2014-01-01
Supplement: c4ra03969f1.pdf [file c4ra03969f1.pdf]

## Supporting Information

# Polyiminofluorene with Conjugated Benzimidazolylpyridine Substituent Groups: Optical Properties, Ionochromism and Coordinative Self-Assembly into Electrochromic Films

Kalie Cheng and Bernd Tieke\*

## Contents

- 1 Figure S1. MALDI-TOF spectrum of **P1**
- 2 Figure S2. UV-Vis-spectra of the titration of P1 with ZnCl<sub>2</sub> in toluene/methanol 50:1
- 3 Figure S3. UV-Vis-spectra of the titration of P1 with Zn(OAc)<sub>2</sub> in toluene/methanol 50:1
- 4 Figure S4. UV-Vis-spectra of the titration of P1 with CuCl<sub>2</sub> in toluene/methanol 50:1
- 5 Figure S5. UV-Vis-spectra of the titration of P1 with NiCl<sub>2</sub> in toluene/methanol 50:1
- 6 Figure S6. UV-Vis-spectra of the titration of P1 with CoCl<sub>2</sub> in toluene/methanol 50:1
- 7 Figure S7. UV-Vis-spectra of the titration of P1 with Fe(ClO<sub>4</sub>)<sub>2</sub> in toluene/methanol 50:1
- 8 Figure S8. UV-Vis-spectra of the titration of P1 with FeCl<sub>3</sub> in toluene/methanol 50:1
- 9 Figure S9. UV-Vis-spectra of the titration of P1 with MnCl<sub>2</sub> in toluene/methanol 50:1

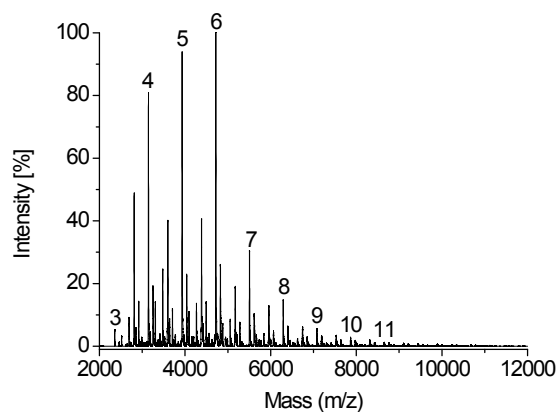

**Figure S1:** MALDI-TOF spectrum of **P1**.

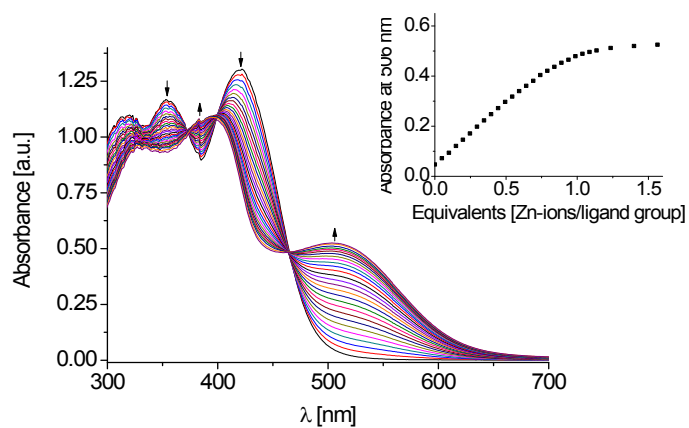

**Figure S2:** UV-Vis-spectra of the titration of **P1** with  $\text{ZnCl}_2$  in toluene/methanol 50:1 until the mono-complex is formed. Plots of the absorbance at specific wavelengths vs. equivalents of Zn-ions added are shown in the inset.

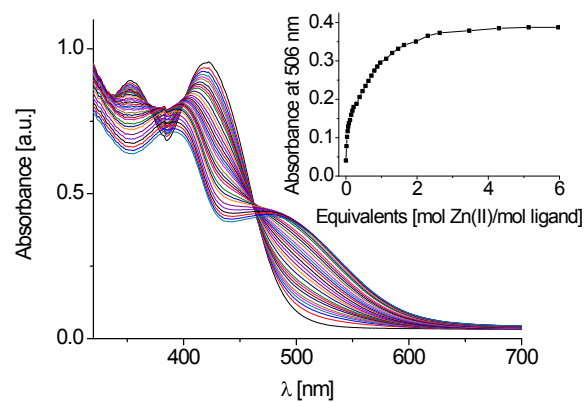

**Figure S3:** UV-Vis-spectra of the titration of **P1** with  $\text{Zn}(\text{OAc})_2$  in toluene/methanol 50:1 until the mono-complex is formed. Plots of the absorbance at specific wavelengths vs. equivalents of Zn-ions added are shown in the inset.

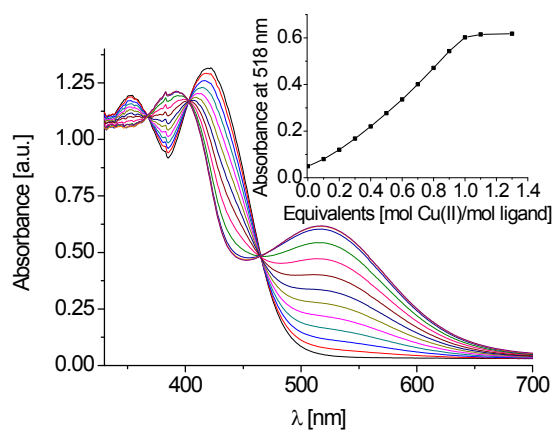

**Figure S4:** UV-Vis-spectra of the titration of **P1** with  $\text{CuCl}_2$  in toluene/methanol 50:1 until the mono-complex is formed. Plots of the absorbance at specific wavelengths vs. equivalents of Cu-ions added are shown in the inset.

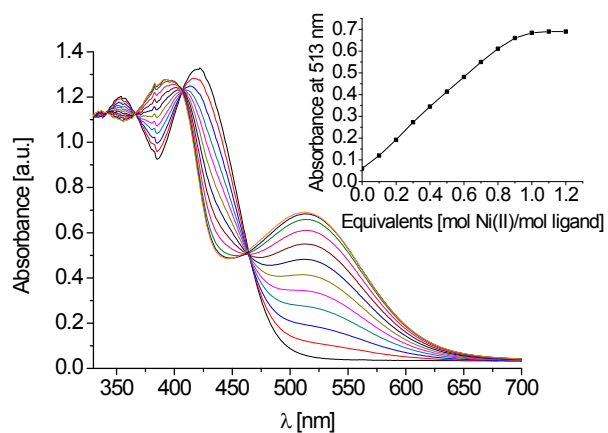

**Figure S5:** UV-Vis-spectra of the titration of **P1** with NiCl<sub>2</sub> in toluene/methanol 50:1 until the mono-complex is formed. Plots of the absorbance at specific wavelengths vs. equivalents of Ni-ions added are shown in the inset.

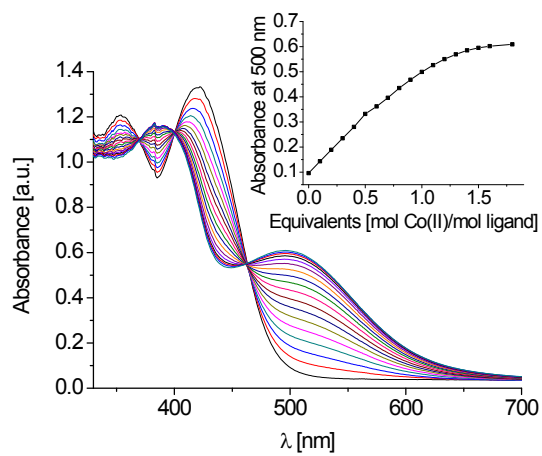

**Figure S6:** UV-Vis-spectra of the titration of **P1** with CoCl<sub>2</sub> in toluene/methanol 50:1 until the mono-complex is formed. Plots of the absorbance at specific wavelengths vs. equivalents of Co-ions added are shown in the inset.

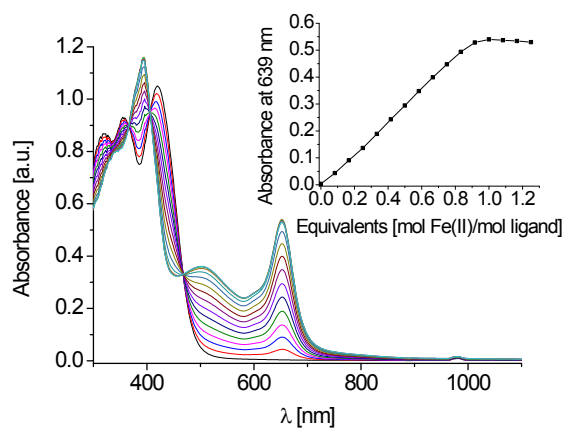

**Figure S7:** UV-Vis-spectra of the titration of **P1** with  $\text{Fe}(\text{ClO}_4)_2$  in toluene/methanol 50:1 until the mono-complex is formed. Plots of the absorbance at specific wavelengths vs. equivalents of Fe-ions added are shown in the inset.

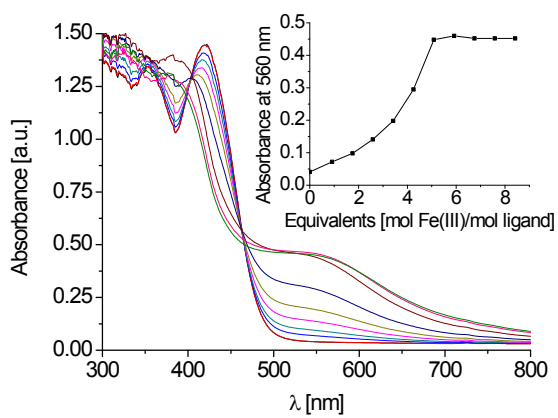

**Figure S8:** UV-Vis-spectra of the titration of **P1** with  $\text{FeCl}_3$  in toluene/methanol 50:1 until the mono-complex is formed. Plots of the absorbance at specific wavelengths vs. equivalents of Fe-ions added are shown in the inset.

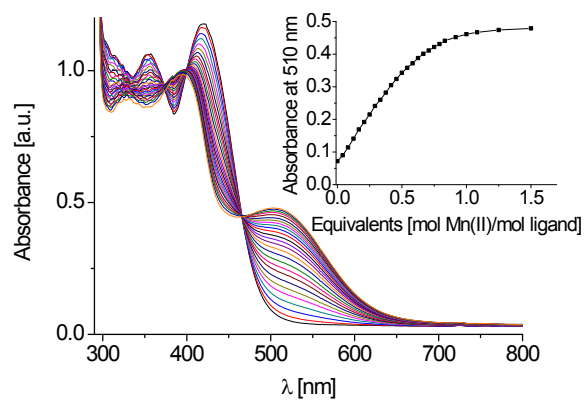

**Figure S9:** UV-Vis-spectra of the titration of **P1** with  $\text{MnCl}_2$  in toluene/methanol 50:1 until the mono-complex is formed. Plots of the absorbance at specific wavelengths vs. equivalents of Mn-ions added are shown in the inset.
